# Supplementary material for: Exogenous Dopamine Application Promotes Alkali Tolerance of Apple Seedlings
Source: PubMed Central journal article supplement (PMC6963653; doi:10.3390/plants8120580), 2019-12-07
Supplement: plants-08-00580-s001.pdf [file plants-08-00580-s001.pdf]

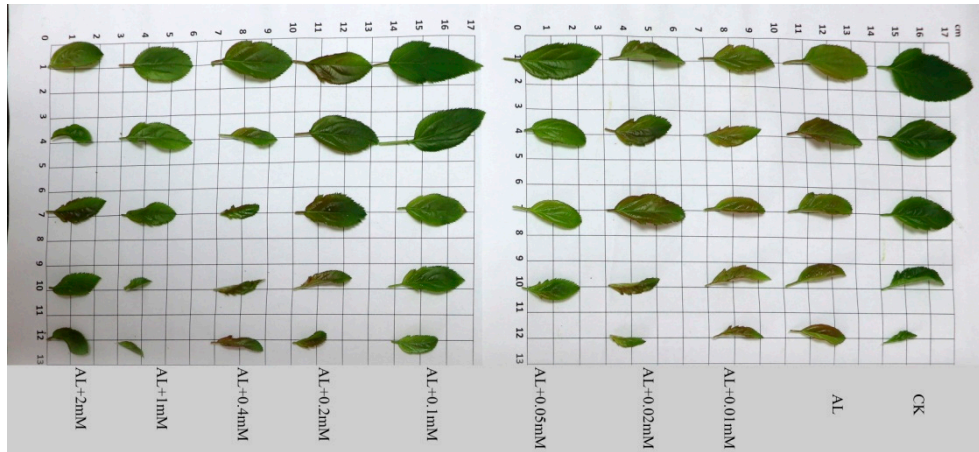

**Figure S1.** Phenotype of leaves of apple seedlings treated with dopamine (DA) of different concentration under alkali stress for 15 days. For information on treatments, please see Figure 1.

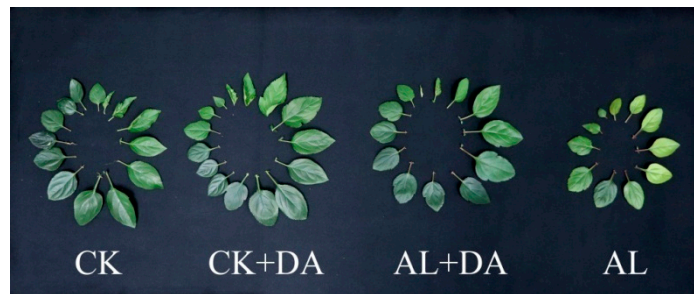

**Figure S2.** Phenotypes of leaves of apple seedlings treated with dopamine (DA) under alkali stress for 15 days. For information on treatments, please see Figure 3.
